# Supplementary material
Source: PubMed Central journal article supplement (PMC8626540)

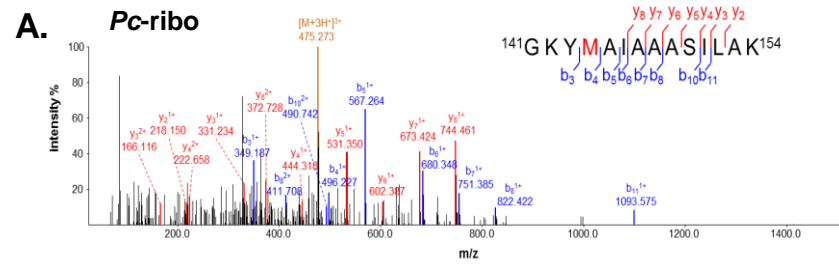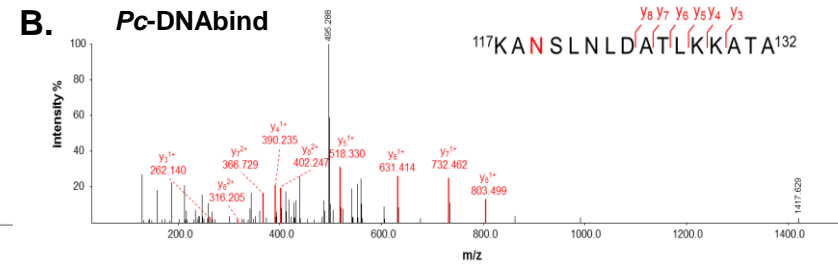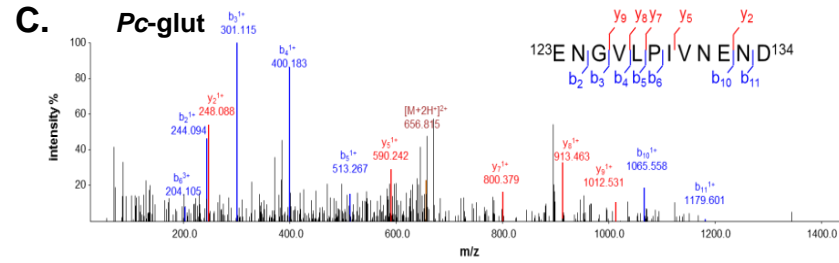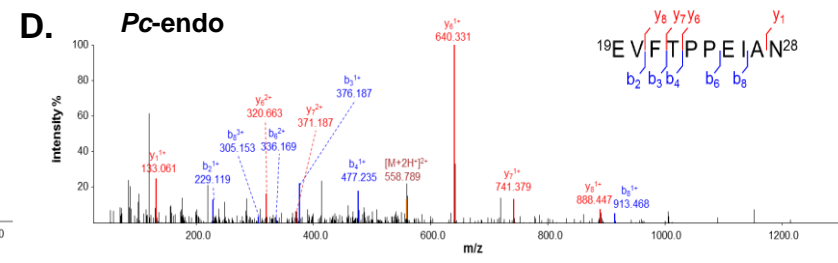

Supplement: NIHMS1703967-supplement-sm1.pdf [file NIHMS1703967-supplement-sm1.pdf]
